# Supplementary material for: Pandemics in the Age of Twitter: Content Analysis of Tweets during the 2009 H1N1 Outbreak
Source: PLOS journal article supplement (doi:10.1371/journal.pone.0014118), 2010-11-29
Supplement: S1 (10.1371/journal.pone.0014118.s001) [file journal.pone.0014118.s001]

**Table S1: SQL Queries for Automated Tweet Coding & Analysis**

**Content Concepts**

|                                    |                                                                                                                                                                                                                                                                                                                                                                                                                                                                                                                                                                                                                                                                                                                                                                                                                                                                                                                                                                                                                                                                                                                                                                                                                                                                                                                                                                                                                                                                                                                                                                                                                                                                                                                                                                                                                                                                                                                                                                                                                                                                                                                                                                                                                                                                                                                                                                                                                                                                                            |
|------------------------------------|--------------------------------------------------------------------------------------------------------------------------------------------------------------------------------------------------------------------------------------------------------------------------------------------------------------------------------------------------------------------------------------------------------------------------------------------------------------------------------------------------------------------------------------------------------------------------------------------------------------------------------------------------------------------------------------------------------------------------------------------------------------------------------------------------------------------------------------------------------------------------------------------------------------------------------------------------------------------------------------------------------------------------------------------------------------------------------------------------------------------------------------------------------------------------------------------------------------------------------------------------------------------------------------------------------------------------------------------------------------------------------------------------------------------------------------------------------------------------------------------------------------------------------------------------------------------------------------------------------------------------------------------------------------------------------------------------------------------------------------------------------------------------------------------------------------------------------------------------------------------------------------------------------------------------------------------------------------------------------------------------------------------------------------------------------------------------------------------------------------------------------------------------------------------------------------------------------------------------------------------------------------------------------------------------------------------------------------------------------------------------------------------------------------------------------------------------------------------------------------------|
| <p><b>Resources</b></p>            | <p>SELECT DISTINCT T.title, T.tweetid, T.id, T.publishdate, T.link, T.content, T.updatedate, T.authername, T.authoruri, W.webcite_id, W.long_url,COUNT( T.title ) AS number_hits FROM tweets T LEFT JOIN webcite W ON T.tweetid = W.tweetid WHERE publishdate BETWEEN "2009-05-01 00:00:00" AND "2009-12-31 23:59:59" AND ((LOWER(`title`) LIKE "%swine flu%" OR LOWER(`title`) LIKE "%swineflu%" OR LOWER(`title`) LIKE "%h1n1%")) AND ((LOWER(`title`) NOT LIKE "%rt @" AND LOWER(`title`) NOT LIKE "%rt@%")) AND ((LOWER(title) LIKE "%http://%" OR (LOWER(title) LIKE "%https://%")) GROUP by title ORDER BY publishdate ASC</p>                                                                                                                                                                                                                                                                                                                                                                                                                                                                                                                                                                                                                                                                                                                                                                                                                                                                                                                                                                                                                                                                                                                                                                                                                                                                                                                                                                                                                                                                                                                                                                                                                                                                                                                                                                                                                                                       |
| <p><b>Personal Experiences</b></p> | <p><u>Subconcept: “Personal/direct H1N1 experience”</u><br/> SELECT DISTINCT T.title, T.tweetid, T.id, T.publishdate, T.link, T.content, T.updatedate, T.authername, T.authoruri, W.webcite_id, W.long_url,COUNT( T.title ) AS number_hits FROM tweets T LEFT JOIN webcite W ON T.tweetid = W.tweetid WHERE publishdate BETWEEN "2009-05-01 00:00:00" AND "2009-12-31 23:59:59" AND ((LOWER(`title`) LIKE "%swine flu%" OR LOWER(`title`) LIKE "%swineflu%" OR LOWER(`title`) LIKE "%h1n1%")) AND ((LOWER(`title`) NOT LIKE "%rt @" AND LOWER(`title`) NOT LIKE "%rt@%")) AND ((LOWER(title) LIKE "%I have swine flu%" OR (LOWER(title) LIKE "%I have h1n1%" OR (LOWER(title) LIKE "%I might have swine flu%" OR (LOWER(title) LIKE "%I might have h1n1%" OR (LOWER(title) LIKE "%I might have the swine flu%" OR (LOWER(title) LIKE "%I think i have h1n1%" OR (LOWER(title) LIKE "%i think i have swine flu%" OR (LOWER(title) LIKE "%i think i have the swine flu%" OR (LOWER(title) LIKE "%i think i might have%" OR (LOWER(title) LIKE "%i feel sick%" OR (LOWER(title) LIKE "%i\\m coming down with %" OR (LOWER(title) LIKE "%im coming down with%" OR (LOWER(title) LIKE "%i\\m getting sick%" OR (LOWER(title) LIKE "%im getting sick%" OR (LOWER(title) LIKE "%getting tested for swine flu%" OR (LOWER(title) LIKE "%getting tested for h1n1%" OR (LOWER(title) LIKE "%getting checked out for swine flu%" OR (LOWER(title) LIKE "%getting checked out for h1n1%" OR (LOWER(title) LIKE "%going to the doctor%" OR (LOWER(title) LIKE "%went to the doctor%" OR (LOWER(title) LIKE "%going to see the doctor%" OR (LOWER(title) LIKE "%going to a clinic%" OR (LOWER(title) LIKE "%going to the clinic%" OR (LOWER(title) LIKE "%went to the clinic%" OR (LOWER(title) LIKE "%went to a clinic%" OR (LOWER(title) LIKE "%i have symptoms%" OR (LOWER(title) LIKE "%i have a fever%" OR (LOWER(title) LIKE "%i\\m feeling sick%")) GROUP by title ORDER BY publishdate ASC</p> <p>-OR-</p> <p><u>Subconcept: “Indirect Experience”</u><br/> SELECT DISTINCT T.title, T.tweetid, T.id, T.publishdate, T.link, T.content, T.updatedate, T.authername, T.authoruri, W.webcite_id, W.long_url,COUNT( T.title ) AS number_hits FROM tweets T LEFT JOIN webcite W ON T.tweetid = W.tweetid WHERE publishdate BETWEEN "2009-05-01 00:00:00" AND "2009-12-31 23:59:59" AND ((LOWER(`title`) LIKE "%swine flu%" OR LOWER(`title`) LIKE "%swineflu%" OR LOWER(`title`) LIKE "%h1n1%"))</p> |

AND ((LOWER(`title`) NOT LIKE "%rt @" AND LOWER(`title`) NOT LIKE "%rt@%")) AND ((LOWER(title) LIKE "%my mom%" ) OR (LOWER(title) LIKE "%my mum%" ) OR (LOWER(title) LIKE "%my mother%" ) OR (LOWER(title) LIKE "%my dad%" ) OR (LOWER(title) LIKE "%my father%" ) OR (LOWER(title) LIKE "%my bro%" ) OR (LOWER(title) LIKE "%my sis%" ) OR (LOWER(title) LIKE "%my uncle%" ) OR (LOWER(title) LIKE "%my aunt%" ) OR (LOWER(title) LIKE "%my grandm%" ) OR (LOWER(title) LIKE "%my grandpa%" ) OR (LOWER(title) LIKE "%my grandfather%" ) OR (LOWER(title) LIKE "%my cousin%" ) OR (LOWER(title) LIKE "%my niece%" ) OR (LOWER(title) LIKE "%my nephew%" ) OR (LOWER(title) LIKE "%my friend%" ) OR (LOWER(title) LIKE "%my classmate%" ) OR (LOWER(title) LIKE "%my neighbour%" ) OR (LOWER(title) LIKE "%my roommate%" ) OR (LOWER(title) LIKE "%my boyfriend%" ) OR (LOWER(title) LIKE "%my girlfriend%" ) OR (LOWER(title) LIKE "%my bf%" ) OR (LOWER(title) LIKE "%my gf%" ) OR (LOWER(title) LIKE "%my wife%" ) OR (LOWER(title) LIKE "%my husband%" ) OR (LOWER(title) LIKE "%my kid%" ) OR (LOWER(title) LIKE "%my son%" ) OR (LOWER(title) LIKE "%my daughter%" ) OR (LOWER(title) LIKE "%my baby%" ) OR (LOWER(title) LIKE "%my doctor%" ) OR (LOWER(title) LIKE "%my co-worker%" ) OR (LOWER(title) LIKE "%my coworker%" ) OR (LOWER(title) LIKE "%my co worker%" ) OR (LOWER(title) LIKE "%my class%" ) OR (LOWER(title) LIKE "%my school%" ) OR (LOWER(title) LIKE "%my university%" ) OR (LOWER(title) LIKE "%my church%" ) OR (LOWER(title) LIKE "%my city%" ) OR (LOWER(title) LIKE "%my town%" ) OR (LOWER(title) LIKE "%my dorm%" ) OR (LOWER(title) LIKE "%my rez%" ) OR (LOWER(title) LIKE "%my campus%" ) OR (LOWER(title) LIKE "%my home%" ) OR (LOWER(title) LIKE "%my house%" ) OR (LOWER(title) LIKE "%my office%" ) OR (LOWER(title) LIKE "%my work%" ) OR (LOWER(title) LIKE "%my country%")) GROUP by title ORDER BY publishdate ASC

-OR-

Subconcept: "Vaccination Experience"

SELECT DISTINCT T.title, T.tweetid, T.id, T.publishdate, T.link, T.content, T.updatedate, T.authername, T.authoruri, W.webcite\_id, W.long\_url, COUNT( T.title ) AS number\_hits FROM tweets T LEFT JOIN webcite W ON T.tweetid = W.tweetid WHERE publishdate BETWEEN "2009-05-01 00:00:00" AND "2009-12-31 23:59:59" AND ((LOWER(`title`) LIKE "%swine flu%" OR LOWER(`title`) LIKE "%swineflu%" OR LOWER(`title`) LIKE "%h1n1%")) AND ((LOWER(`title`) NOT LIKE "%rt @" AND LOWER(`title`) NOT LIKE "%rt@%")) AND ((LOWER(title) LIKE "%got my shot%" ) OR (LOWER(title) LIKE "%got my h1n1 shot%" ) OR (LOWER(title) LIKE "%got my swine flu shot%" ) OR (LOWER(title) LIKE "%got vaccinated %" ) OR (LOWER(title) LIKE "%i\'m vaccinated%" ) OR (LOWER(title) LIKE "%got the swine flu shot%" ) OR (LOWER(title) LIKE "%got the h1n1 shot%" ) OR (LOWER(title) LIKE "%got the h1n1 jab%" ) OR (LOWER(title) LIKE "%got the swine flu jab%" ) OR (LOWER(title) LIKE "%got my swine flu jab%" ) OR (LOWER(title) LIKE "%got my h1n1 jab%" ) OR (LOWER(title) LIKE "%got the h1n1 vaccine%" ) OR (LOWER(title) LIKE "%got the swine flu vaccine%" ) OR (LOWER(title) LIKE "%got my swine flu vaccine%" ) OR (LOWER(title) LIKE "%got my h1n1 vaccine%" ) OR (LOWER(title) LIKE "%got my h1n1

|                                         |                                                                                                                                                                                                                                                                                                                                                                                                                                                                                                                                                                                                                                                                                                                                                                                                                                                                                                                                                                                                                                                                                                                                                                                                                                                                                                                                                                                                                                                                                                                                                                                                                                                                                                                                                                                                                                                                                                                                                                                                                                                                                                                                        |
|-----------------------------------------|----------------------------------------------------------------------------------------------------------------------------------------------------------------------------------------------------------------------------------------------------------------------------------------------------------------------------------------------------------------------------------------------------------------------------------------------------------------------------------------------------------------------------------------------------------------------------------------------------------------------------------------------------------------------------------------------------------------------------------------------------------------------------------------------------------------------------------------------------------------------------------------------------------------------------------------------------------------------------------------------------------------------------------------------------------------------------------------------------------------------------------------------------------------------------------------------------------------------------------------------------------------------------------------------------------------------------------------------------------------------------------------------------------------------------------------------------------------------------------------------------------------------------------------------------------------------------------------------------------------------------------------------------------------------------------------------------------------------------------------------------------------------------------------------------------------------------------------------------------------------------------------------------------------------------------------------------------------------------------------------------------------------------------------------------------------------------------------------------------------------------------------|
|                                         | <p>immuni%") OR (LOWER(title) LIKE "%got my swine flu immuni%") OR (LOWER(title) LIKE "%went to get the vaccine%") OR (LOWER(title) LIKE "%went to get vaccinated%") OR (LOWER(title) LIKE "%went to get the swine flu shot%") OR (LOWER(title) LIKE "%went to get the swine flu vaccine%") OR (LOWER(title) LIKE "%went to get the swine flu jab%") OR (LOWER(title) LIKE "%went to get my swine flu jab%") OR (LOWER(title) LIKE "%went to get my swine flu shot%") OR (LOWER(title) LIKE "%went to get my swine flu vaccine%") OR (LOWER(title) LIKE "%went to get the h1n1 shot%") OR (LOWER(title) LIKE "%went to get the h1n1 vaccine%") OR (LOWER(title) LIKE "%went to get the h1n1 jab%") OR (LOWER(title) LIKE "%is immuni%") OR (LOWER(title) LIKE "%went to get my h1n1 shot%") OR (LOWER(title) LIKE "%went to get my h1n1 vaccin%") OR (LOWER(title) LIKE "%went to get my h1n1 jab%")) GROUP by title ORDER BY publishdate ASC</p>                                                                                                                                                                                                                                                                                                                                                                                                                                                                                                                                                                                                                                                                                                                                                                                                                                                                                                                                                                                                                                                                                                                                                                                      |
| <p><b>Personal Opinion/Interest</b></p> | <p>SELECT DISTINCT T.title, T.tweetid, T.id, T.publishdate, T.link, T.content, T.updatedate, T.authername, T.authoruri, W.webcite_id, W.long_url,COUNT( T.title ) AS number_hits FROM tweets T LEFT JOIN webcite W ON T.tweetid = W.tweetid WHERE publishdate BETWEEN "2009-05-01 00:00:00" AND "2009-12-31 23:59:59" AND ((LOWER(`title`) LIKE "%swine flu%" OR LOWER(`title`) LIKE "%swineflu%" OR LOWER(`title`) LIKE "%h1n1%")) AND ((LOWER(`title`) NOT LIKE "%rt @" AND LOWER(`title`) NOT LIKE "%rt@%")) AND ((LOWER(title) LIKE "%in my opinion%" OR (LOWER(title) LIKE "%i think%" OR (LOWER(title) LIKE "%imho%" OR (LOWER(title) LIKE "%government should%" OR (LOWER(title) LIKE "%gov\t should%" OR (LOWER(title) LIKE "%doctors should%" OR (LOWER(title) LIKE "%Obama should%" OR (LOWER(title) LIKE "%media should%" OR (LOWER(title) LIKE "%cdc should%" OR (LOWER(title) LIKE "%i believe%" OR (LOWER(title) LIKE "%schools should%" OR (LOWER(title) LIKE "%teachers should%" OR (LOWER(title) LIKE "%hospitals should%" OR (LOWER(title) LIKE "%people should%" OR (LOWER(title) LIKE "%my stance%" OR (LOWER(title) LIKE "%my take%" OR (LOWER(title) LIKE "%my view%" OR (LOWER(title) LIKE "%my feeling%" OR (LOWER(title) LIKE "%my impression%" OR (LOWER(title) LIKE "%my theory%" OR (LOWER(title) LIKE "%my thought%" OR (LOWER(title) LIKE "% pov %" OR (LOWER(title) LIKE "%my opinion%" OR (LOWER(title) LIKE "%i recommend%" OR (LOWER(title) LIKE "%i suggest%" OR (LOWER(title) LIKE "%my suggestion%" OR (LOWER(title) LIKE "%did you hear%" OR (LOWER(title) LIKE "%reading%" AND NOT LOWER(title) LIKE "%spreading%" OR (LOWER(title) LIKE "%interest%" OR (LOWER(title) LIKE "%looking up%" AND NOT LOWER(title) LIKE "%things are looking up%" AND NOT LOWER(title) LIKE "%it\slooking up%" OR (LOWER(title) LIKE "%researching%" OR (LOWER(title) LIKE "%heard %" OR (LOWER(title) LIKE "%read %" AND NOT LOWER(title) LIKE "%spread %" OR LOWER(title) LIKE "%I read %" OR (LOWER(title) LIKE "%i hear %" OR (LOWER(title) LIKE "%i feel that%")) GROUP by title ORDER BY publishdate ASC</p> |

## Qualifiers Concepts

|                              |                                                                                                                                                                                                                                                                                                                                                                                                                                                                                                                                                                                                                                                                                                                                                                                                                                                                                                                                                                                                                                                                                                                                                                                                                                                                                                                                                                                                                                                                                                                                                                                                                                                                                                                                                                                                                           |
|------------------------------|---------------------------------------------------------------------------------------------------------------------------------------------------------------------------------------------------------------------------------------------------------------------------------------------------------------------------------------------------------------------------------------------------------------------------------------------------------------------------------------------------------------------------------------------------------------------------------------------------------------------------------------------------------------------------------------------------------------------------------------------------------------------------------------------------------------------------------------------------------------------------------------------------------------------------------------------------------------------------------------------------------------------------------------------------------------------------------------------------------------------------------------------------------------------------------------------------------------------------------------------------------------------------------------------------------------------------------------------------------------------------------------------------------------------------------------------------------------------------------------------------------------------------------------------------------------------------------------------------------------------------------------------------------------------------------------------------------------------------------------------------------------------------------------------------------------------------|
| <p><b>Humour/Sarcasm</b></p> | <p>SELECT DISTINCT T.title, T.tweetid, T.id, T.publishdate, T.link, T.content, T.updatedate, T.authorname, T.authoruri, W.webcite_id, W.long_url,COUNT( T.title ) AS number_hits FROM tweets T LEFT JOIN webcite W ON T.tweetid = W.tweetid WHERE publishdate BETWEEN "2009-05-01 00:00:00" AND "2009-12-31 23:59:59" AND ((LOWER(`title`) LIKE "%swine flu%" OR LOWER(`title`) LIKE "%swineflu%" OR LOWER(`title`) LIKE "%h1n1%")) AND ((LOWER(`title`) NOT LIKE "%rt @" AND LOWER(`title`) NOT LIKE "%rt@%")) AND ((LOWER(title) LIKE "%lol%" ) OR (LOWER(title) LIKE "%LMAO%" ) OR (LOWER(title) LIKE "%haha%" ) OR (LOWER(title) LIKE "%hehe%" ) OR (LOWER(title) LIKE "%hilarious%" ) OR (LOWER(title) LIKE "%funny%" ) OR (LOWER(title) LIKE "%ode to tamiflu%" ) OR (LOWER(title) LIKE "%j/k%" ) OR (LOWER(title) LIKE "% XD %" ) OR (LOWER(title) LIKE ":%P%" ) OR (LOWER(title) LIKE "%=P%" ) OR (LOWER(title) LIKE "%ROFL%" ) OR (LOWER(title) LIKE ":%)" ) OR (LOWER(title) LIKE "%=%)" ) OR (LOWER(title) LIKE "% jk %" ) OR (LOWER(title) LIKE "% xP %" ) OR (LOWER(title) LIKE ":%;" ) OR (LOWER(title) LIKE "%=D%" ) OR (LOWER(title) LIKE ":%D%" ) OR (LOWER(title) LIKE "%ha ha%" ) OR (LOWER(title) LIKE "%joking%" ) OR (LOWER(title) LIKE "%just kiddin%" ) OR (LOWER(title) LIKE "%piggy%" ) OR (LOWER(title) LIKE "%oink%" AND NOT LOWER(title) LIKE "%#oink%" ) OR (LOWER(title) LIKE "%bacon flu%" ) OR (LOWER(title) LIKE "%when pigs fly%" ) OR (LOWER(title) LIKE "%he he %" ) OR (LOWER(title) LIKE "%heh%" ) OR (LOWER(title) LIKE "%unlikelysequels%" ) OR (LOWER(title) LIKE "%bacon fever%" ) OR (LOWER(title) LIKE "%joke%" AND NOT LOWER(title) LIKE "%what a joke%" ) OR (LOWER(title) LIKE "%hiney%" ) OR (LOWER(title) LIKE "%heinie%")) GROUP by title ORDER BY publishdate ASC</p> |
| <p><b>Relief</b></p>         | <p>SELECT DISTINCT T.title, T.tweetid, T.id, T.publishdate, T.link, T.content, T.updatedate, T.authorname, T.authoruri, W.webcite_id, W.long_url,COUNT( T.title ) AS number_hits FROM tweets T LEFT JOIN webcite W ON T.tweetid = W.tweetid WHERE publishdate BETWEEN "2009-05-01 00:00:00" AND "2009-12-31 23:59:59" AND ((LOWER(`title`) LIKE "%swine flu%" OR LOWER(`title`) LIKE "%swineflu%" OR LOWER(`title`) LIKE "%h1n1%")) AND ((LOWER(title) NOT LIKE "%RT@" AND "%RT @%")) AND ((LOWER(title) LIKE "%relieved%" ) OR (LOWER(title) LIKE "%thank God%" ) OR (LOWER(title) LIKE "%thankful%" ) OR (LOWER(title) LIKE "%whew%" ) OR (LOWER(title) LIKE "%i am ok%" ) OR (LOWER(title) LIKE "%im ok%" ) OR (LOWER(title) LIKE "%all better%" ) OR (LOWER(title) LIKE "%feeling % better%" AND NOT LOWER(title) LIKE "%not feeling % better%" ) OR (LOWER(title) LIKE "%relief%" ) OR (LOWER(title) LIKE "%i\m recovering%" ) OR (LOWER(title) LIKE "%i just recovered%" ) OR (LOWER(title) LIKE "%i\ve recovered%" ) OR (LOWER(title) LIKE "%back at school%" ) OR (LOWER(title) LIKE "%back at work%" ) OR (LOWER(title) LIKE "%glad that %" ) OR (LOWER(title) LIKE "%happy to hear%" ) OR (LOWER(title) LIKE "%glad to hear%" ) OR (LOWER(title) LIKE "%i\m safe%" ) OR (LOWER(title) LIKE "%grateful%" AND NOT LOWER(title) LIKE "%ungrateful%" ) OR (LOWER(title) LIKE "%good to hear%" ) OR (LOWER(title) LIKE "%happy that%" ) OR (LOWER(title) LIKE "%good that%" ) OR (LOWER(title) LIKE "%survived%" ) OR (LOWER(title) LIKE "%bounced back%" ) OR (LOWER(title) LIKE "%recuperate%" ) OR</p>                                                                                                                                                                                                            |

|                |                                                                                                                                                                                                                                                                                                                                                                                                                                                                                                                                                                                                                                                                                                                                                                                                                                                                                                                                                                                                                                                                                                                                                                                                                                                                                                                                                                                                                                                                                                                                                                                                                                                                                                                                                                                                                                                                                                                                                                                                                                                                                                                                                                                                                                                                                                                                                                                                                                                                                                                                                                                                                                                                                                                                                                                                                                                                                                                                                                                                      |
|----------------|------------------------------------------------------------------------------------------------------------------------------------------------------------------------------------------------------------------------------------------------------------------------------------------------------------------------------------------------------------------------------------------------------------------------------------------------------------------------------------------------------------------------------------------------------------------------------------------------------------------------------------------------------------------------------------------------------------------------------------------------------------------------------------------------------------------------------------------------------------------------------------------------------------------------------------------------------------------------------------------------------------------------------------------------------------------------------------------------------------------------------------------------------------------------------------------------------------------------------------------------------------------------------------------------------------------------------------------------------------------------------------------------------------------------------------------------------------------------------------------------------------------------------------------------------------------------------------------------------------------------------------------------------------------------------------------------------------------------------------------------------------------------------------------------------------------------------------------------------------------------------------------------------------------------------------------------------------------------------------------------------------------------------------------------------------------------------------------------------------------------------------------------------------------------------------------------------------------------------------------------------------------------------------------------------------------------------------------------------------------------------------------------------------------------------------------------------------------------------------------------------------------------------------------------------------------------------------------------------------------------------------------------------------------------------------------------------------------------------------------------------------------------------------------------------------------------------------------------------------------------------------------------------------------------------------------------------------------------------------------------------|
|                | (LOWER(title) LIKE "%escape%")) GROUP by title ORDER BY publishdate ASC                                                                                                                                                                                                                                                                                                                                                                                                                                                                                                                                                                                                                                                                                                                                                                                                                                                                                                                                                                                                                                                                                                                                                                                                                                                                                                                                                                                                                                                                                                                                                                                                                                                                                                                                                                                                                                                                                                                                                                                                                                                                                                                                                                                                                                                                                                                                                                                                                                                                                                                                                                                                                                                                                                                                                                                                                                                                                                                              |
| <b>Concern</b> | <p><u>Subconcept: "Concern for Others"</u><br/> SELECT DISTINCT T.title, T.tweetid, T.id, T.publishdate, T.link, T.content, T.updatedate, T.authorname, T.authoruri, W.webcite_id, W.long_url,COUNT( T.title ) AS number_hits FROM tweets T LEFT JOIN webcite W ON T.tweetid = W.tweetid WHERE publishdate BETWEEN "2009-05-01 00:00:00" AND "2009-12-31 23:59:59" AND ((LOWER(`title`) LIKE "%swine flu%" OR LOWER(`title`) LIKE "%swineflu%" OR LOWER(`title`) LIKE "%h1n1%")) AND ((LOWER(title) NOT LIKE "%RT@%" AND "%RT @%")) AND ((LOWER(title) LIKE "%get better%" ) OR (LOWER(title) LIKE "%get well%" ) OR (LOWER(title) LIKE "%take care%" ) OR (LOWER(title) LIKE "%are you ok%" ) OR (LOWER(title) LIKE "%is it swine flu%" ) OR (LOWER(title) LIKE "%is it h1n1%" ) OR (LOWER(title) LIKE "%is it the swine flu%" ) OR (LOWER(title) LIKE "%r u ok%" ) OR (LOWER(title) LIKE "%hope % is ok%" ) OR (LOWER(title) LIKE "%hope you don't get %" ) OR (LOWER(title) LIKE "%hope you're not sick%" ) OR (LOWER(title) LIKE "%hope you aren't sick%" ) OR (LOWER(title) LIKE "%hope u r ok%" ) OR (LOWER(title) LIKE "%hope u don't get %" ) OR (LOWER(title) LIKE "%hope u aren't infected%" ) OR (LOWER(title) LIKE "%hope you aren't infected%" ) OR (LOWER(title) LIKE "%go to the doctor%" ) OR (LOWER(title) LIKE "%go to the clinic%" ) OR (LOWER(title) LIKE "%get checked out%" ) OR (LOWER(title) LIKE "%get tested%" ) OR (LOWER(title) LIKE "%quarantine yourself%" ) OR (LOWER(title) LIKE "%stay home%" ) OR (LOWER(title) LIKE "%has swine flu%" ) OR (LOWER(title) LIKE "%has h1n1%" ) OR (LOWER(title) LIKE "%has the swine flu%" ) OR (LOWER(title) LIKE "%poor %")) GROUP by title ORDER BY publishdate ASC</p> <p>-OR-</p> <p><u>Subconcept: "Concerned Emoticons"</u><br/> SELECT DISTINCT T.title, T.tweetid, T.id, T.publishdate, T.link, T.content, T.updatedate, T.authorname, T.authoruri, W.webcite_id, W.long_url,COUNT( T.title ) AS number_hits FROM tweets T LEFT JOIN webcite W ON T.tweetid = W.tweetid WHERE publishdate BETWEEN "2009-05-01 00:00:00" AND "2009-12-31 23:59:59" AND ((LOWER(`title`) LIKE "%swine flu%" OR LOWER(`title`) LIKE "%swineflu%" OR LOWER(`title`) LIKE "%h1n1%")) AND ((LOWER(title) NOT LIKE "%RT@%" AND "%RT @%")) AND ((LOWER(title) LIKE "%:(%" ) OR (LOWER(title) LIKE "%=(%" ) OR (LOWER(title) LIKE "%:-(%" ) OR (LOWER(title) LIKE "%:\(%)" ) OR (LOWER(title) LIKE "%=\(%)" ) OR (LOWER(title) LIKE "%:\ %" ) OR (LOWER(title) LIKE "%= %" ) OR (LOWER(title) LIKE "%: %" ) OR (LOWER(title) LIKE "%:o%" ) OR (LOWER(title) LIKE "%o.o%" ) OR (LOWER(title) LIKE "% :S %")) GROUP by title ORDER BY publishdate ASC</p> <p>-OR-</p> <p><u>Subconcept: "General Concern"</u><br/> SELECT DISTINCT T.title, T.tweetid, T.id, T.publishdate, T.link, T.content, T.updatedate, T.authorname, T.authoruri, W.webcite_id, W.long_url,COUNT( T.title ) AS number_hits FROM tweets T LEFT JOIN webcite W ON T.tweetid =</p> |

W.tweetid WHERE publishdate BETWEEN "2009-05-01 00:00:00" AND "2009-12-31 23:59:59" AND ((LOWER(`title`) LIKE "%swine flu%" OR LOWER(`title`) LIKE "%swineflu%" OR LOWER(`title`) LIKE "%h1n1%")) AND ((LOWER(title) NOT LIKE "%RT@%" AND "%RT @%")) AND ((LOWER(title) LIKE "%omg%") OR (LOWER(title) LIKE "%oh my god%") OR (LOWER(title) LIKE "%uh oh%") OR (LOWER(title) LIKE "%oh no%") OR (LOWER(title) LIKE "%worried%" AND NOT LOWER(title) LIKE "%not worried%" AND NOT LOWER(title) LIKE "%unworried%") OR (LOWER(title) LIKE "%scared%" AND NOT LOWER(title) LIKE "%not scared%" AND NOT LOWER(title) LIKE "%don't bescared%" AND NOT LOWER(title) LIKE "%dont be scared%") OR (LOWER(title) LIKE "%stay away%") OR (LOWER(title) LIKE "%dangerous%" AND NOT LOWER(title) LIKE "%not dangerous%" AND NOT LOWER(title) LIKE "%no more dangerous%" AND NOT LOWER(title) LIKE "%less dangerous%") OR (LOWER(title) LIKE "%terrified%") OR (LOWER(title) LIKE "%afraid%" AND NOT LOWER(title) LIKE "%not afraid%" AND NOT LOWER(title) LIKE "%don't be afraid%" AND NOT LOWER(title) LIKE "%stop being afraid%" AND NOT LOWER(title) LIKE "%unafraid%" AND NOT LOWER(title) LIKE "%dont be afraid%") OR (LOWER(title) LIKE "%frightened%" AND NOT LOWER(title) LIKE "%not frightened%") OR (LOWER(title) LIKE "%freaking out%" AND NOT LOWER(title) LIKE "%not freaking out%" AND NOT LOWER(title) LIKE "%stop freaking out%") OR (LOWER(title) LIKE "%freakin out%" AND NOT LOWER(title) LIKE "%not freakin out%" AND NOT LOWER(title) LIKE "%stop freakin out%") OR (LOWER(title) LIKE "%nervous%") OR (LOWER(title) LIKE "%sad%" AND NOT LOWER(title) LIKE "%palisad%" AND NOT LOWER(title) LIKE "%passad%" AND NOT LOWER(title) LIKE "%pasad%") OR (LOWER(title) LIKE "%grief%") OR (LOWER(title) LIKE "%stress%" AND NOT LOWER(title) LIKE "%mistress%" AND NOT LOWER(title) LIKE "%officials stress%") OR (LOWER(title) LIKE "%scary%" AND NOT LOWER(title) LIKE "%not scary%") OR (LOWER(title) LIKE "%confused%") OR (LOWER(title) LIKE "%confusing%") OR (LOWER(title) LIKE "%yikes%") OR (LOWER(title) LIKE "%uneasy%") OR (LOWER(title) LIKE "%I worry%") OR (LOWER(title) LIKE "%worrisome%" AND NOT LOWER(title) LIKE "%not worrisome%") OR (LOWER(title) LIKE "%dread%") OR (LOWER(title) LIKE "%concern%" AND NOT LOWER(title) LIKE "%unconcern%" AND NOT LOWER(title) LIKE "%not concern%" AND NOT LOWER(title) LIKE "%don't be concern%" AND NOT LOWER(title) LIKE "%dont be concern%" AND NOT LOWER(title) LIKE "%don't concern%" AND NOT LOWER(title) LIKE "%dont concern%" OR LOWER(title) LIKE "%i am concern%" OR LOWER(title) LIKE "%i\\'m concern%" OR LOWER(title) LIKE "%im concern%" OR LOWER(title) LIKE "%kind of concern%" OR LOWER(title) LIKE "%kinda concern%" OR LOWER(title) LIKE "%sort of concern%" OR LOWER(title) LIKE "%sorta concern%" OR LOWER(title) LIKE "%really concern%")) GROUP BY title ORDER BY publishdate ASC

-OR-

Subconcept: "Concern for Self"

SELECT DISTINCT T.title, T.tweetid, T.id, T.publishdate, T.link, T.content, T.updatedate, T.authorname, T.authoruri, W.webcite\_id, W.long\_url, COUNT(T.title) AS number\_hits FROM tweets T LEFT JOIN webcite W ON T.tweetid =

|                 |                                                                                                                                                                                                                                                                                                                                                                                                                                                                                                                                                                                                                                                                                                                                                                                                                                                                                                                                                                                                                                                                                                                                                                                                                                                                                                                                                                                                                                                                                                                                                                                                                                                                                                                                                                                                                                                                                                                                                                                                                                                                                                                                                                                                                                                                                                                                                                                                                                                                                                                                                                                                               |
|-----------------|---------------------------------------------------------------------------------------------------------------------------------------------------------------------------------------------------------------------------------------------------------------------------------------------------------------------------------------------------------------------------------------------------------------------------------------------------------------------------------------------------------------------------------------------------------------------------------------------------------------------------------------------------------------------------------------------------------------------------------------------------------------------------------------------------------------------------------------------------------------------------------------------------------------------------------------------------------------------------------------------------------------------------------------------------------------------------------------------------------------------------------------------------------------------------------------------------------------------------------------------------------------------------------------------------------------------------------------------------------------------------------------------------------------------------------------------------------------------------------------------------------------------------------------------------------------------------------------------------------------------------------------------------------------------------------------------------------------------------------------------------------------------------------------------------------------------------------------------------------------------------------------------------------------------------------------------------------------------------------------------------------------------------------------------------------------------------------------------------------------------------------------------------------------------------------------------------------------------------------------------------------------------------------------------------------------------------------------------------------------------------------------------------------------------------------------------------------------------------------------------------------------------------------------------------------------------------------------------------------------|
|                 | <p>W.tweetid WHERE publishdate BETWEEN "2009-05-01 00:00:00" AND "2009-12-31 23:59:59" AND ((LOWER(`title`) LIKE "%swine flu%" OR LOWER(`title`) LIKE "%swineflu%" OR LOWER(`title`) LIKE "%h1n1%")) AND ((LOWER(title) NOT LIKE "%RT@%" AND "%RT @%")) AND ((LOWER(title) LIKE "%I might have h1n1%" ) OR (LOWER(title) LIKE "%I might have swine flu%" ) OR (LOWER(title) LIKE "%I might have the swine flu%" ) OR (LOWER(title) LIKE "%I think I have the swine flu%" ) OR (LOWER(title) LIKE "%I think I have swine flu%" ) OR (LOWER(title) LIKE "%I think I have h1n1%" ) OR (LOWER(title) LIKE "%I don't want to die%" ) OR (LOWER(title) LIKE "%I have a fever%" ) OR (LOWER(title) LIKE "%I have symptoms%" ) OR (LOWER(title) LIKE "%I feel sick%" ) OR (LOWER(title) LIKE "%not feeling well%" ) OR (LOWER(title) LIKE "%feeling sick%" ) OR (LOWER(title) LIKE "%I'm sick%")) GROUP by title ORDER BY publishdate ASC</p>                                                                                                                                                                                                                                                                                                                                                                                                                                                                                                                                                                                                                                                                                                                                                                                                                                                                                                                                                                                                                                                                                                                                                                                                                                                                                                                                                                                                                                                                                                                                                                                                                                                                         |
| <b>Downplay</b> | <p>SELECT DISTINCT T.title, T.tweetid, T.id, T.publishdate, T.link, T.content, T.updatedate, T.authername, T.authoruri, W.webcite_id, W.long_url,COUNT( T.title ) AS number_hits FROM tweets T LEFT JOIN webcite W ON T.tweetid = W.tweetid WHERE publishdate BETWEEN "2009-05-01 00:00:00" AND "2009-12-31 23:59:59" AND ((LOWER(`title`) LIKE "%swine flu%" OR LOWER(`title`) LIKE "%swineflu%" OR LOWER(`title`) LIKE "%h1n1%")) AND ((LOWER(`title`) NOT LIKE "%rt @%" AND LOWER(`title`) NOT LIKE "%rt@%")) AND ((LOWER(title) LIKE "%not a big deal%" ) OR (LOWER(title) LIKE "%hype%" ) OR (LOWER(title) LIKE "%overblown%" ) OR (LOWER(title) LIKE "%just swine flu%" ) OR (LOWER(title) LIKE "%not worried%" ) OR (LOWER(title) LIKE "%not afraid%" ) OR (LOWER(title) LIKE "%forget about swine flu%" AND NOT LOWER(title) LIKE "%don't forget about swine flu%" AND NOT LOWER(title) LIKE "%dont forget about swine flu%" AND NOT LOWER(title) LIKE "%do not forget about swine flu%" ) OR (LOWER(title) LIKE "%it's not that bad%" ) OR (LOWER(title) LIKE "%i've had worse%" ) OR (LOWER(title) LIKE "%hysteria%" ) OR (LOWER(title) LIKE "%just relax%" ) OR (LOWER(title) LIKE "%calm down%" ) OR (LOWER(title) LIKE "%don't panic%" ) OR (LOWER(title) LIKE "%paranoi%" AND NOT LOWER(title) LIKE "%I am paranoi%" AND NOT LOWER(title) LIKE "%Im paranoi%" AND NOT LOWER(title) LIKE "%I'm paranoi%" AND NOT LOWER(title) LIKE "%I'm getting paranoi%" AND NOT LOWER(title) LIKE "%Im getting paranoi%" AND NOT LOWER(title) LIKE "%I am paranoi%" AND NOT LOWER(title) LIKE "%I'm becoming paranoi%" AND NOT LOWER(title) LIKE "%I am becoming paranoi%" AND NOT LOWER(title) LIKE "%Im becomingparanoi%" AND NOT LOWER(title) LIKE "%I am so paranoi%" AND NOT LOWER(title) LIKE "%I'm so paranoi%" AND NOT LOWER(title) LIKE "%Im so paranoi%") OR (LOWER(title) LIKE "%not concerned%" ) OR (LOWER(title) LIKE "%like regular flu%" ) OR (LOWER(title) LIKE "%what's the big deal%" ) OR (LOWER(title) LIKE "%milder than regular flu%" ) OR (LOWER(title) LIKE "%not dangerous%" ) OR (LOWER(title) LIKE "%less dangerous%" ) OR (LOWER(title) LIKE "%less deadly%" ) OR (LOWER(title) LIKE "%milder than seasonal%" ) OR (LOWER(title) LIKE "%more people die from%" ) OR (LOWER(title) LIKE "%million people have aids%" ) OR (LOWER(title) LIKE "%forget about h1n1%" AND NOT LOWER(title) LIKE "%don't forget about h1n1%" AND NOT LOWER(title) LIKE "%dont forget about h1n1%" AND NOT LOWER(title) LIKE "%do not forget about h1n1%" ) OR (LOWER(title) LIKE "%don't care%" )</p> |

|                       |                                                                                                                                                                                                                                                                                                                                                                                                                                                                                                                                                                                                                                                                                                                                                                                                                                                                                                                                                                                                                                                                                                                                                                                                                                                                                                                                                                                                                                                                                                                                                                                                                                                                                                                                                                                                                                                                                                                                                                                                                                                                                                                                                                                                                                                                                                                               |
|-----------------------|-------------------------------------------------------------------------------------------------------------------------------------------------------------------------------------------------------------------------------------------------------------------------------------------------------------------------------------------------------------------------------------------------------------------------------------------------------------------------------------------------------------------------------------------------------------------------------------------------------------------------------------------------------------------------------------------------------------------------------------------------------------------------------------------------------------------------------------------------------------------------------------------------------------------------------------------------------------------------------------------------------------------------------------------------------------------------------------------------------------------------------------------------------------------------------------------------------------------------------------------------------------------------------------------------------------------------------------------------------------------------------------------------------------------------------------------------------------------------------------------------------------------------------------------------------------------------------------------------------------------------------------------------------------------------------------------------------------------------------------------------------------------------------------------------------------------------------------------------------------------------------------------------------------------------------------------------------------------------------------------------------------------------------------------------------------------------------------------------------------------------------------------------------------------------------------------------------------------------------------------------------------------------------------------------------------------------------|
|                       | <p>OR (LOWER(title) LIKE "%not worried%") OR (LOWER(title) LIKE "%dont care%") OR (LOWER(title) LIKE "%who cares%") OR (LOWER(title) LIKE "%forget swine flu%" AND NOT LOWER(title) LIKE "%don't forget swine flu%" AND NOT LOWER(title) LIKE "%dont forget swine flu%" AND NOT LOWER(title) LIKE "%do not forget swine flu%" AND NOT LOWER(title) LIKE "%won't forget swine flu%") OR (LOWER(title) LIKE "%forget h1n1%" AND NOT LOWER(title) LIKE "%don't forget h1n1%" AND NOT LOWER(title) LIKE "%dont forget h1n1%" AND NOT LOWER(title) LIKE "%do not forget h1n1%") OR (LOWER(title) LIKE "%swine flu is nothing%") OR (LOWER(title) LIKE "%h1n1 is nothing%") OR (LOWER(title) LIKE "%like normal flu%") OR (LOWER(title) LIKE "%like regular flu%") OR (LOWER(title) LIKE "%like seasonal flu%")) GROUP BY title ORDER BY publishdate ASC</p>                                                                                                                                                                                                                                                                                                                                                                                                                                                                                                                                                                                                                                                                                                                                                                                                                                                                                                                                                                                                                                                                                                                                                                                                                                                                                                                                                                                                                                                                        |
| <b>Frustration</b>    | <p>SELECT DISTINCT T.title, T.tweetid, T.id, T.publishdate, T.link, T.content, T.updatedate, T.authorname, T.authoruri, W.webcite_id, W.long_url, COUNT( T.title ) AS number_hits FROM tweets T LEFT JOIN webcite W ON T.tweetid = W.tweetid WHERE publishdate BETWEEN "2009-05-01 00:00:00" AND "2009-12-31 23:59:59" AND ((LOWER(`title`) LIKE "%swine flu%" OR LOWER(`title`) LIKE "%swineflu%" OR LOWER(`title`) LIKE "%h1n1%")) AND ((LOWER(`title`) NOT LIKE "%rt @" AND LOWER(`title`) NOT LIKE "%rt@%")) AND ((LOWER(title) LIKE "%swine flu sucks%") OR (LOWER(title) LIKE "%grr%%") OR (LOWER(title) LIKE "%WTF%") OR (LOWER(title) LIKE "%annoy%") OR (LOWER(title) LIKE "%irritat%") OR (LOWER(title) LIKE "%pathetic%") OR (LOWER(title) LIKE "%pissed%") OR (LOWER(title) LIKE "%freakin swine flu%") OR (LOWER(title) LIKE "%FML%") OR (LOWER(title) LIKE "%fuck%") OR (LOWER(title) LIKE "%shit%") OR (LOWER(title) LIKE "%:@%") OR (LOWER(title) LIKE "%&gt;: %") OR (LOWER(title) LIKE "%&gt;:(%)") OR (LOWER(title) LIKE "%shut%up%") OR (LOWER(title) LIKE "%friggin%") OR (LOWER(title) LIKE "%getting out of hand%") OR (LOWER(title) LIKE "%stupid%") OR (LOWER(title) LIKE "%hate swine flu%") OR (LOWER(title) LIKE "%hate h1n1%") OR (LOWER(title) LIKE "%hate being sick%") OR (LOWER(title) LIKE "%hate it%") OR (LOWER(title) LIKE "%h1n1 sucks%") OR (LOWER(title) LIKE "%damn%") OR (LOWER(title) LIKE "%effing%") OR (LOWER(title) LIKE "%freaking swine flu%") OR (LOWER(title) LIKE "%frick%") OR (LOWER(title) LIKE "%freaking h1n1%") OR (LOWER(title) LIKE "%freakin h1n1%") OR (LOWER(title) LIKE "%i can't believe%") OR (LOWER(title) LIKE "%they better not%") OR (LOWER(title) LIKE "%I am mad %" OR LOWER(title) LIKE "%I'm mad %" OR LOWER(title) LIKE "%Im mad %" OR LOWER(title) LIKE "%is mad %" OR LOWER(title) LIKE "%so mad %" OR (LOWER(title) LIKE "%frustrated%") OR (LOWER(title) LIKE "%angry%") OR (LOWER(title) LIKE "%outrage%") OR (LOWER(title) LIKE "%cranky%") OR (LOWER(title) LIKE "%peeved%") OR (LOWER(title) LIKE "%furious%") OR (LOWER(title) LIKE "%bitter%") OR (LOWER(title) LIKE "%irk%") OR (LOWER(title) LIKE "%crushed%") OR (LOWER(title) LIKE "%so sick of%") OR (LOWER(title) LIKE "%if i hear%")) GROUP BY title ORDER BY publishdate ASC</p> |
| <b>Misinformation</b> | <p>SELECT DISTINCT T.title, T.tweetid, T.id, T.publishdate, T.link, T.content, T.updatedate, T.authorname, T.authoruri, W.webcite_id, W.long_url, COUNT( T.title ) AS number_hits FROM tweets T LEFT JOIN webcite W ON T.tweetid = W.tweetid WHERE publishdate BETWEEN "2009-05-01 00:00:00" AND "2009-</p>                                                                                                                                                                                                                                                                                                                                                                                                                                                                                                                                                                                                                                                                                                                                                                                                                                                                                                                                                                                                                                                                                                                                                                                                                                                                                                                                                                                                                                                                                                                                                                                                                                                                                                                                                                                                                                                                                                                                                                                                                   |



|                 |                                                                                                                                                                                                                                                                                                                                                                                                                                                                                                                                                                                                                                                                                                                                                                                                                                                                                                                                                                                                                                                                                                                                                                          |
|-----------------|--------------------------------------------------------------------------------------------------------------------------------------------------------------------------------------------------------------------------------------------------------------------------------------------------------------------------------------------------------------------------------------------------------------------------------------------------------------------------------------------------------------------------------------------------------------------------------------------------------------------------------------------------------------------------------------------------------------------------------------------------------------------------------------------------------------------------------------------------------------------------------------------------------------------------------------------------------------------------------------------------------------------------------------------------------------------------------------------------------------------------------------------------------------------------|
|                 | <p>12-31 23:59:59" AND ((LOWER(`title`) LIKE "%swine flu%" OR LOWER(`title`) LIKE "%swineflu%" OR LOWER(`title`) LIKE "%h1n1%")) AND ((LOWER(`title`) NOT LIKE "%rt @" AND LOWER(`title`) NOT LIKE "%rt@%")) AND ((LOWER(title) LIKE "%hidden%") OR (LOWER(title) LIKE "%secret %") OR (LOWER(title) LIKE "%conspiracy%" AND NOT LOWER(title) LIKE "%not a conspiracy%") OR (LOWER(title) LIKE "%conspirator%" OR (LOWER(title) LIKE "%autism%") OR (LOWER(title) LIKE "%hoax%") OR (LOWER(title) LIKE "%apocalypse%") OR (LOWER(title) LIKE "%armageddon%") OR (LOWER(title) LIKE "%real story%") OR (LOWER(title) LIKE "%poison%") OR (LOWER(title) LIKE "%guillain-barre%") OR (LOWER(title) LIKE "%eugenics%") OR (LOWER(title) LIKE "%plot%") OR (LOWER(title) LIKE "%mind control%" OR (LOWER(title) LIKE "%weapon%" OR (LOWER(title) LIKE "%bioterrorism%" OR (LOWER(title) LIKE "%chemical warfare%" OR (LOWER(title) LIKE "%toxin%" OR (LOWER(title) LIKE "%toxic%" OR (LOWER(title) LIKE "% lie %" OR (LOWER(title) LIKE "% lies %" OR (LOWER(title) LIKE "%mindcontrol%" OR (LOWER(title) LIKE "%mind-control%")) GROUP by title ORDER BY publishdate ASC</p> |
| <b>Question</b> | <p>SELECT DISTINCT T.title, T.tweetid, T.id, T.publishdate, T.link, T.content, T.updatedate, T.authorname, T.authoruri, W.webcite_id, W.long_url, COUNT( T.title ) AS number_hits FROM tweets T LEFT JOIN webcite W ON T.tweetid = W.tweetid WHERE publishdate BETWEEN "2009-05-01 00:00:00" AND "2009-12-31 23:59:59" AND ((LOWER(`title`) LIKE "%swine flu%" OR LOWER(`title`) LIKE "%swineflu%" OR LOWER(`title`) LIKE "%h1n1%")) AND AND ((LOWER(`title`) NOT LIKE "%rt @" AND LOWER(`title`) NOT LIKE "%rt@%")) ((LOWER(title) LIKE "%?%")) GROUP by title ORDER BY publishdate ASC</p>                                                                                                                                                                                                                                                                                                                                                                                                                                                                                                                                                                             |
